# Supplementary material for: A novel P2X2‐dependent purinergic mechanism of enteric gliosis in intestinal inflammation
Source: PubMed Central journal article supplement (PMC7799361; doi:10.15252/emmm.202012724), 2020-12-17
Supplement: EMMM-13-e12724-s001.pdf [file EMMM-13-e12724-s001.pdf]

**Title:**

**A novel P2X2-dependent purinergic mechanism of enteric gliosis in intestinal inflammation**

**Short Title: P2X2 signaling in enteric glia**

**Authors:**

Schneider R.<sup>1</sup>, Leven P.<sup>1</sup>, Glowka T.<sup>1</sup>, Kuzmanov I.<sup>1</sup>, Lysson M.<sup>1</sup>, Schneiker B.<sup>1</sup>, Miesen A.<sup>1</sup>, Baqi Y.<sup>4</sup>, Spanier C.<sup>2</sup>, Grants I.<sup>3</sup>, Mazzotta E.<sup>3</sup>, Villalobos-Hernandez E.<sup>3</sup>, Kalff J.C.<sup>1</sup>, Müller C.E.<sup>2</sup>, Christofi F.L.<sup>3</sup>, Wehner S.<sup>1</sup>

**Table of contents:**

Appendix Fig S1-5 + Fig legends

Appendix Table S1-4

# Appendix Figure S1

**A**

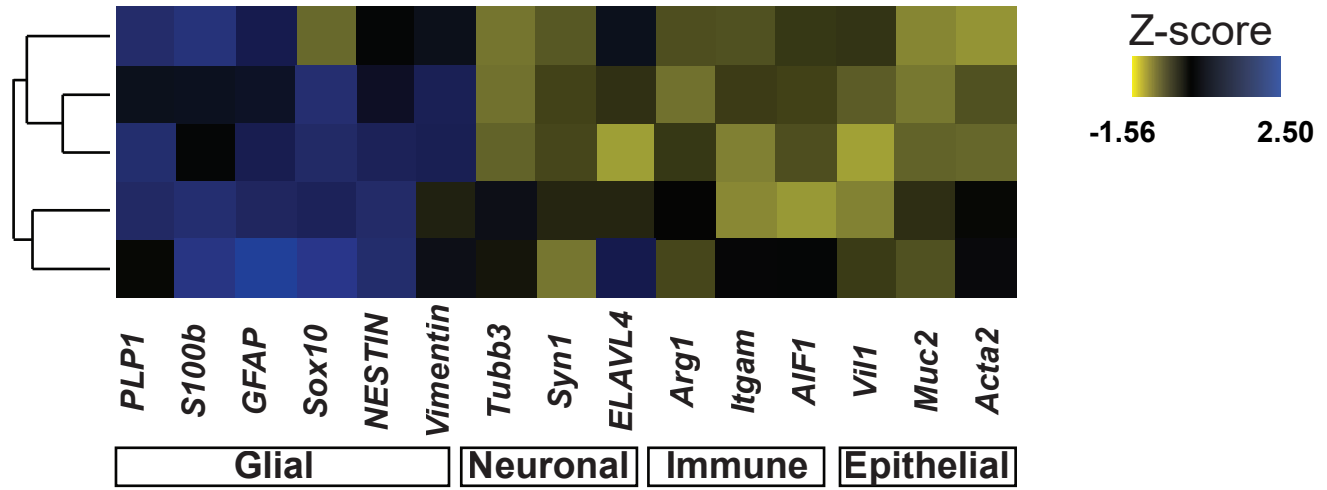

**B**

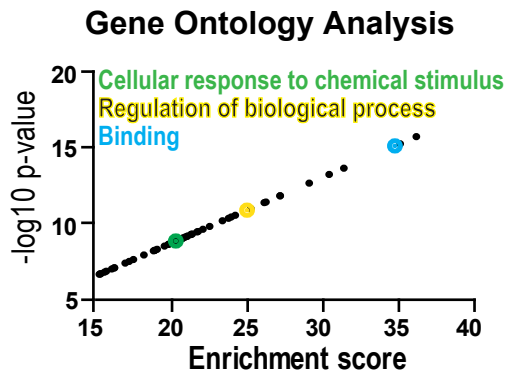

**C**

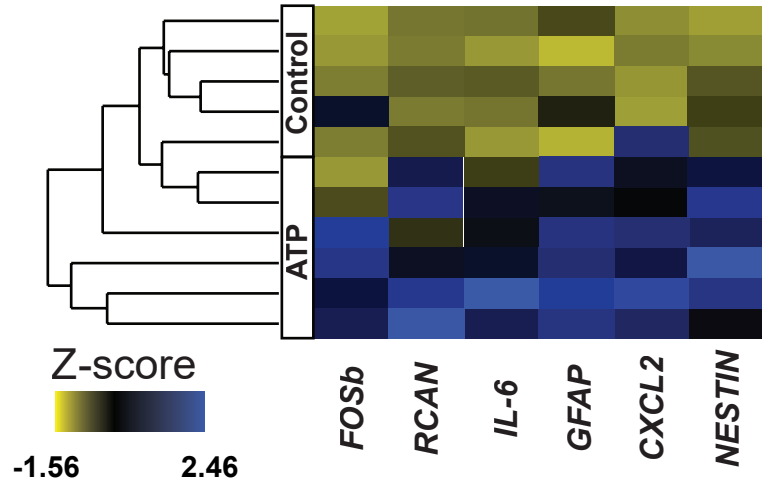

**Appendix Fig S1: ExATP induces gliosis in enteric glia cells.**

**A:** Heat maps of indicated genes in ATP-treated msEGCs compared to control. **B:** Visual representation of GO terms associated with enriched genes in ATP-treated msEGCs compared to control. **C:** Heat maps of indicated genes in ATP-treated msEGCs compared to control (n=5 for untreated EGCs and n=6 for ATP-treated EGCs).

# Appendix Figure S2

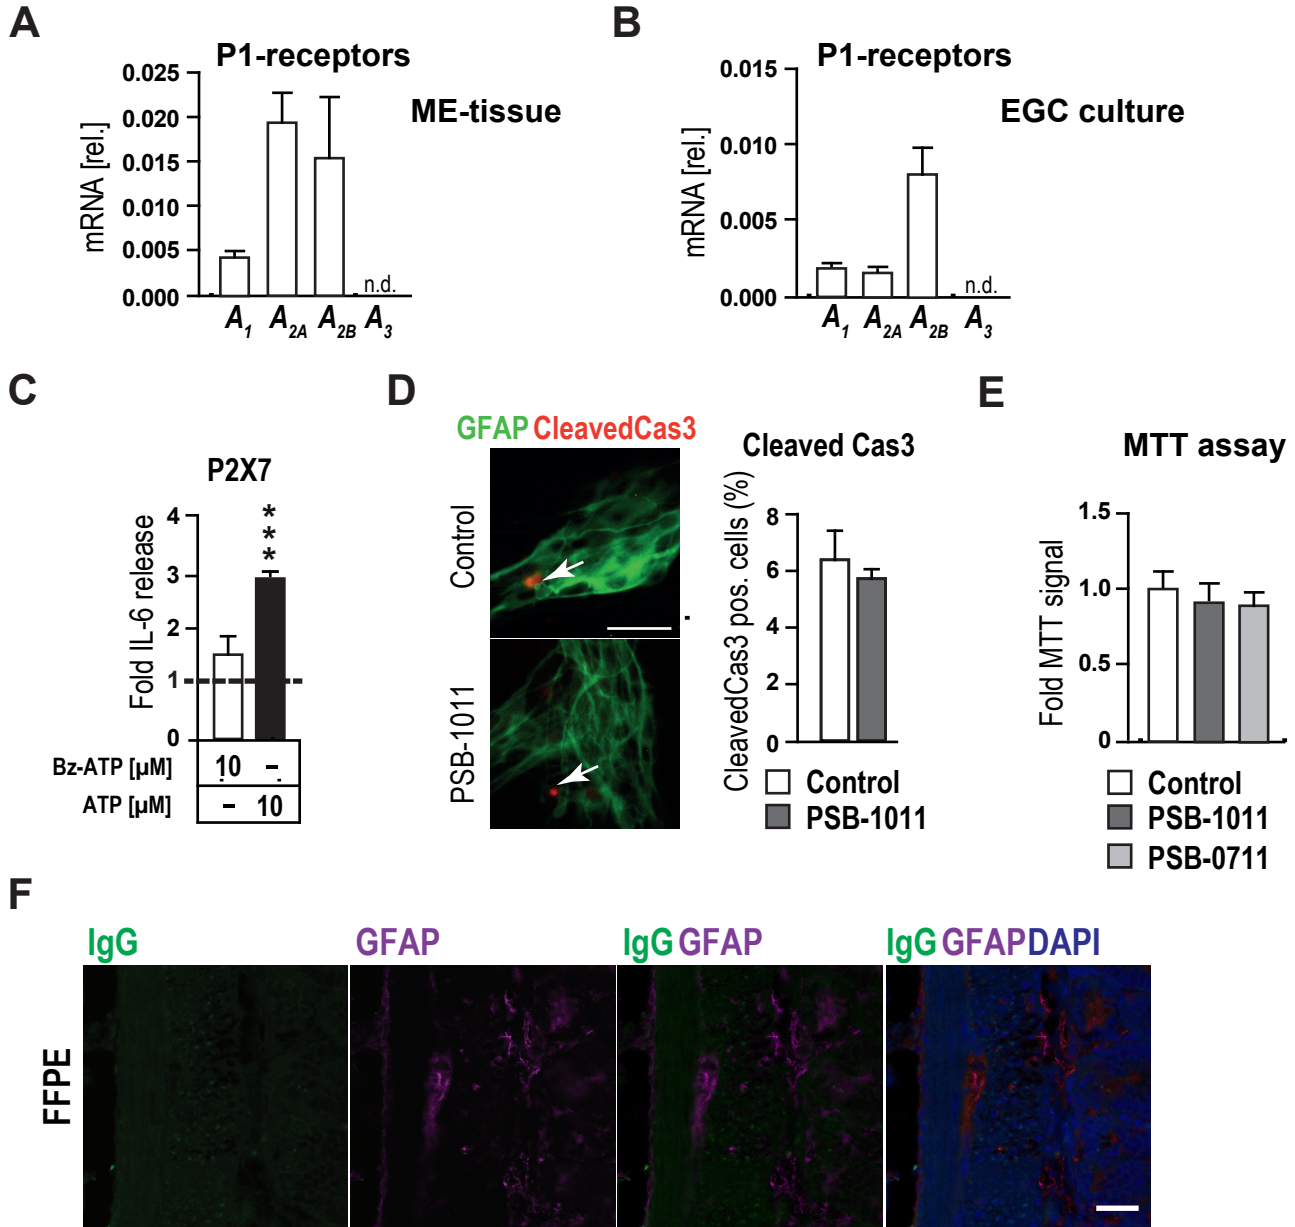



**Appendix Fig S2: ATP-induced gliosis is mediated by p38-MAPK and P2X2-purinergic signaling**

**A+B:** qPCR analysis of P1-purinergic receptors in msEGCs isolated from ME (n=3) or from cultured cells (n=6), respectively. **C:** Protein release measurement by ELISA of IL-6 in EGCs. Cells were treated with the P2X7 agonist bz-ATP (10 $\mu$ M) or with ATP (10 $\mu$ M) for 24h. **D:** Cleaved caspase 3 analysis in EGCs. Representative fluorescence images show GFAP (green) positive EGCs and cleaved caspase 3 (CleavedCas3, red) positive cells. Cells were treated with P2X2-antagonist PSB-1011 (20 $\mu$ M) for 24h. Scale bar 50 $\mu$ m. **E:** MTT assay analysis in EGCs after treatment with PSB-1011 and PSB-0711 (both, 20 $\mu$ M) for 24h. **F:** Representative confocal images show GFAP (violet) positive EGCs and rblgG control (green). Scale bar 50 $\mu$ m.

Data information: In **A+B** data are represented as mean +SEM normalized to *GAPDH* expression. In **C** data are represented as fold-change +SEM; n=8. In **D** data are represented as percentage +SEM of total cell numbers; n=5. Statistics were done in **C** by applying Student's-t-test. \* indicates significance to control.

Appendix Figure S3

A

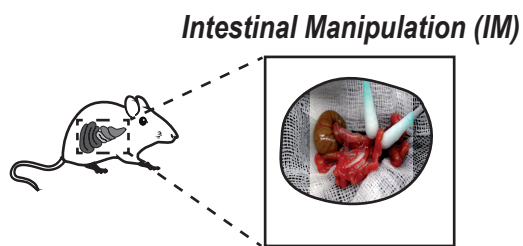

B

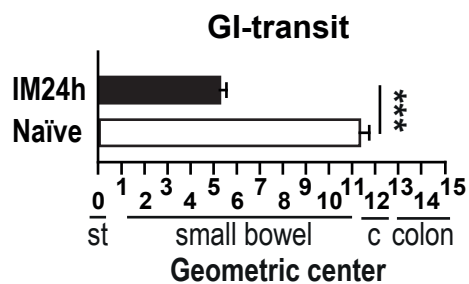

C

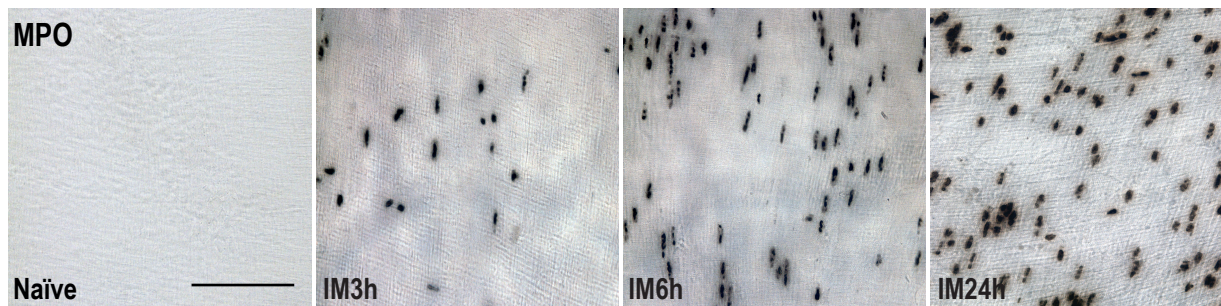

D

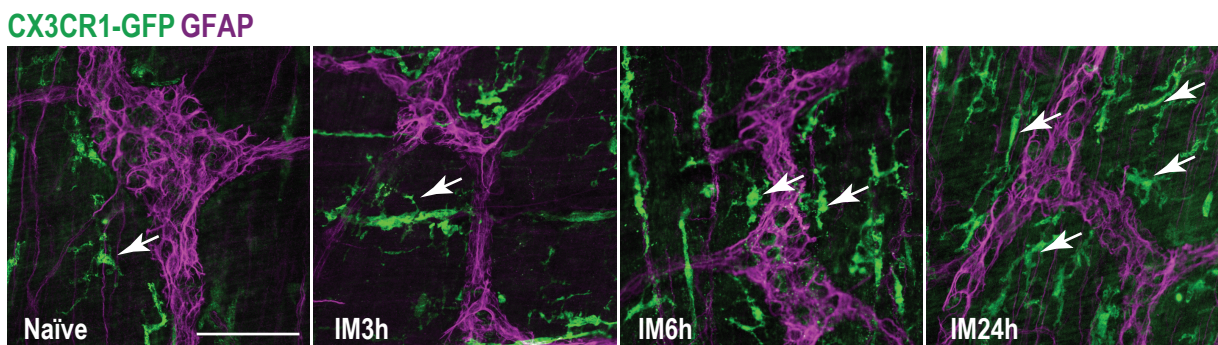

E

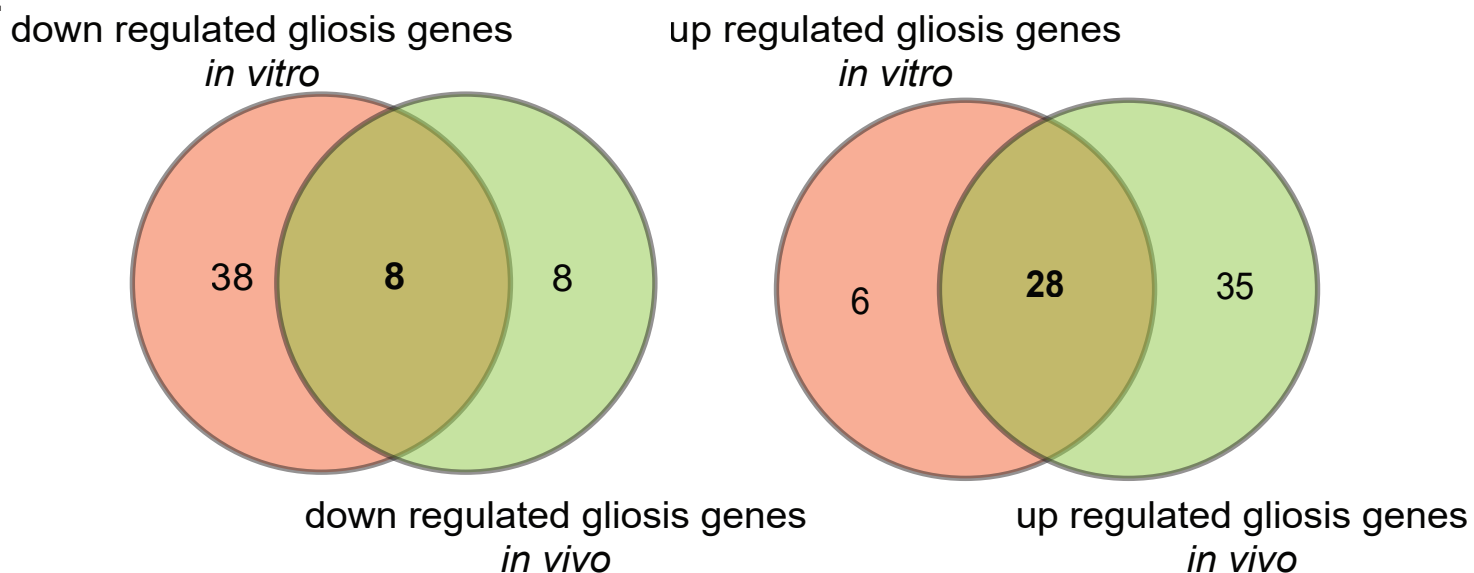

F

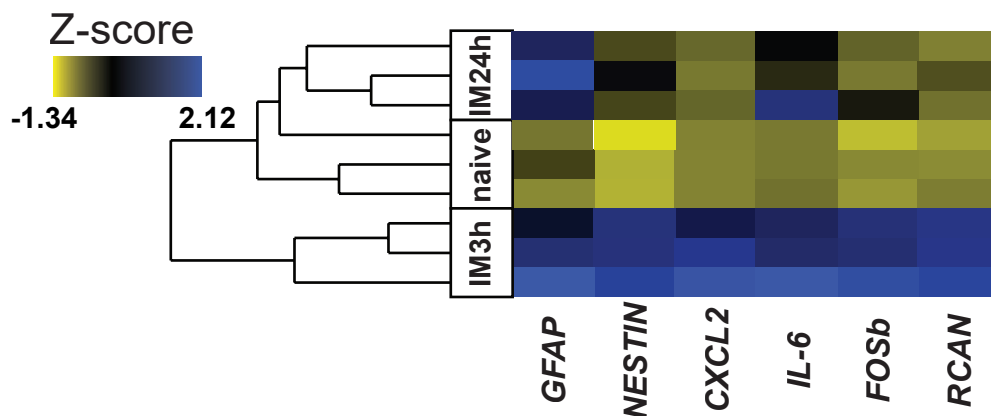

### **Appendix Fig S3: Intestinal inflammation induces enteric gliosis**

**A:** Schematic overview of the animal model of postoperative ileus (POI). **B:** Gastrointestinal transit measurement in naïve and POI mice after IM24h. Data are represented as mean +SEM; n=7. **C:** Representative bright field images of MPO positive cells in the course of POI. Scale bar 50µm. **D:** Representative confocal images of GFAP-positive EGCs (violet) and CX3CR1-positive macrophages (green) at different time points after surgery. White arrows mark resident and later activated macrophages. Scale bar 25µm. **E:** Venn diagram of up and down regulated gliosis genes expressed in EGCs *in vitro* and *in vivo*. **F:** Heat map of all significantly changed genes from POI mice at different disease stages and naïve mice; n=3 for each group.

Data information: In **B** data are represented as mean +SEM; n=7. Statistics were done in **B** by applying Student's-t-test. \* indicates significance to naïve animals.

Appendix Figure S4

A

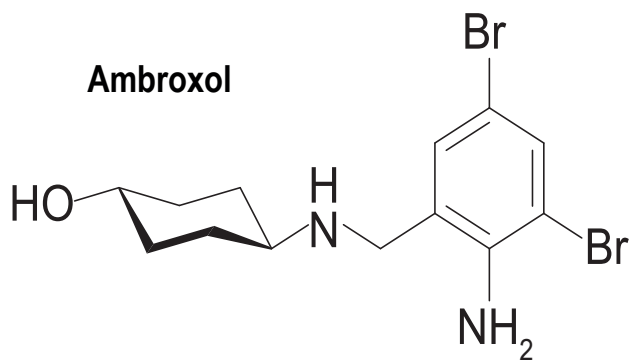

B

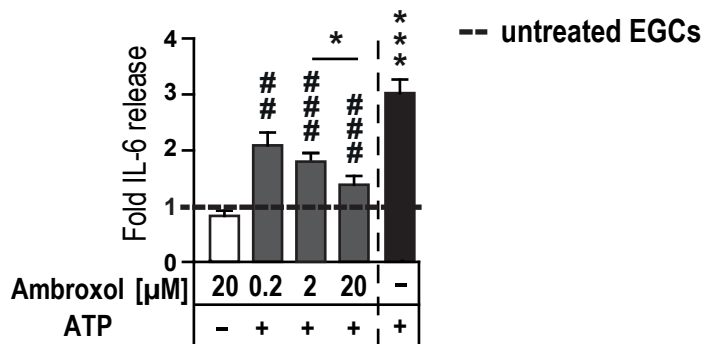

C

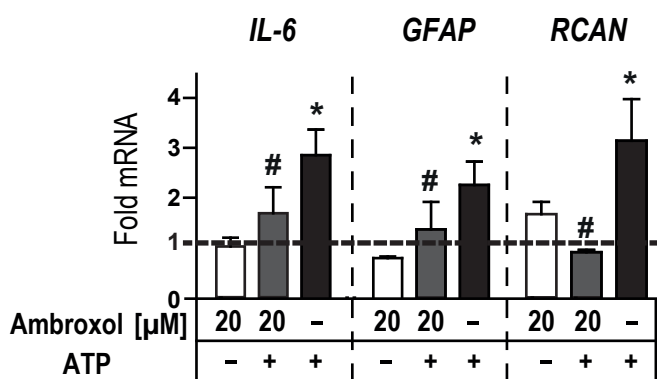

D

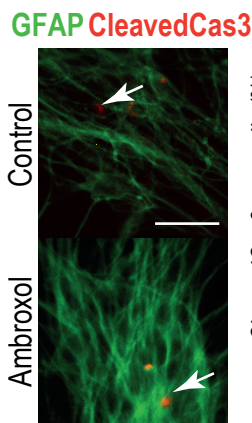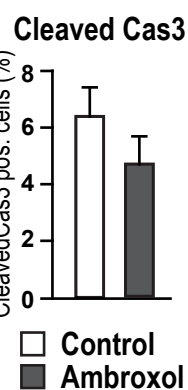

E

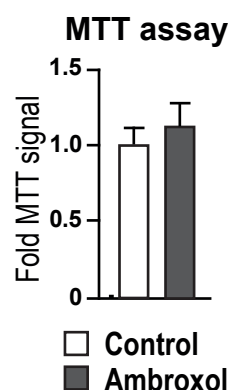

F

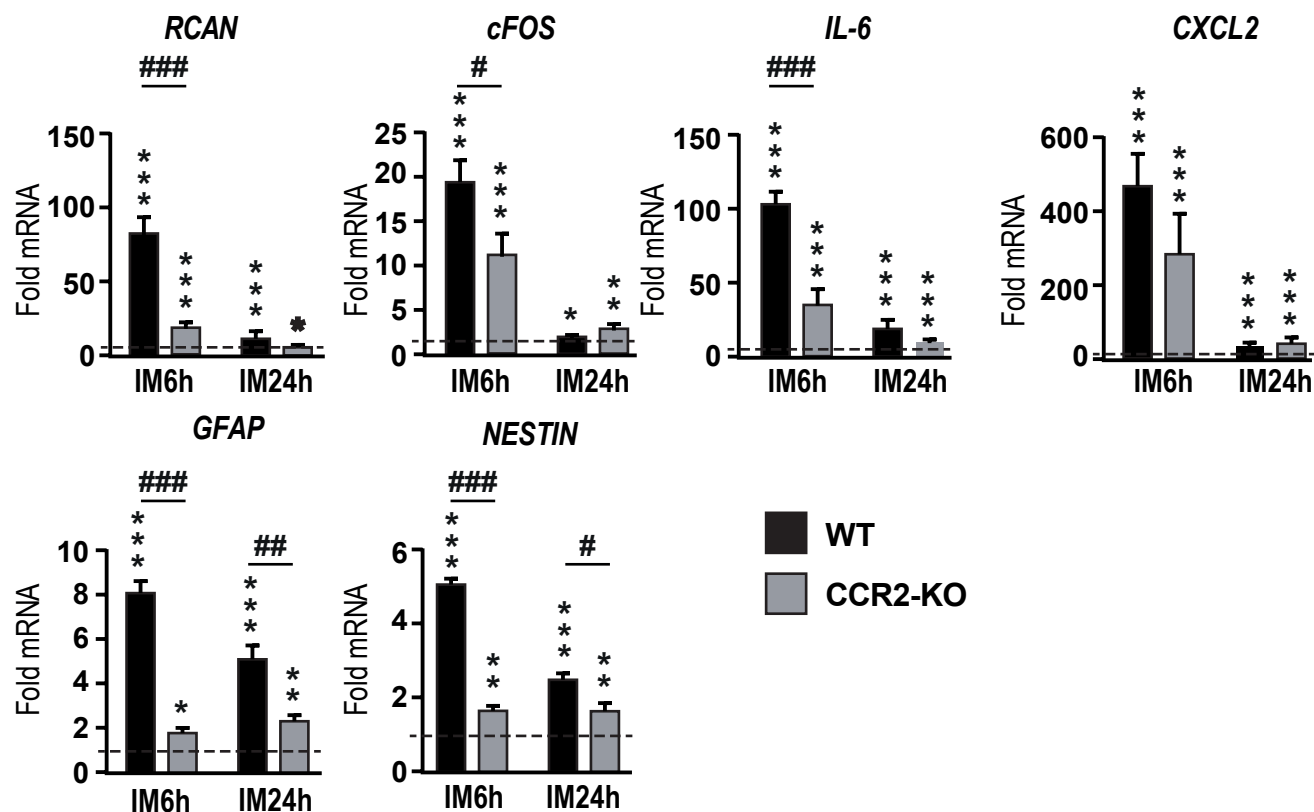

**Appendix Fig S4: P2X2 signaling inhibition by ambroxol improves clinical symptoms in POI**

**A:** Chemical structure of ambroxol. **B:** Ambroxol blocks ATP induced IL-6 release in msEGCs; ELISA measurement of IL-6 in msEGCs upon treatment with ambroxol alone or together with ATP (10 $\mu$ M) for 24h (n=8-16). **C:** Gene expression analysis by qPCR of *IL-6*, *GFAP* and *RCAN* in EGCs. Cells were treated with ambroxol (20 $\mu$ M) alone or together with ATP (10 $\mu$ M) for 6h; n=6. **D:** Cleaved caspase 3 analysis in EGCs. Representative fluorescence images show GFAP (green) positive EGCs and cleaved caspase 3 (CleavedCas3, red) positive cells. Cells were treated with ambroxol (20 $\mu$ M) for 24h. Scale bar 50 $\mu$ m. Data are represented as percentage +SEM of total cell numbers; n=5. **E:** MTT assay analysis in EGCs after treatment with ambroxol (20 $\mu$ M) for 24h. **F:** qPCR analysis of indicated gliosis marker in wt and CCR2<sup>-/-</sup> mice that underwent IM (n=7).

Data information: In **B**, **C** and **F** data are represented as fold change +SEM. Statistics were done in **B,C** and **F** by applying Student's-t-test and one-way ANOVA with a subsequent Bonferroni test. \* indicates significance to control, # indicates significance to ATP treatment or between wt and CCR2<sup>-/-</sup> mice.

# Appendix Figure S5

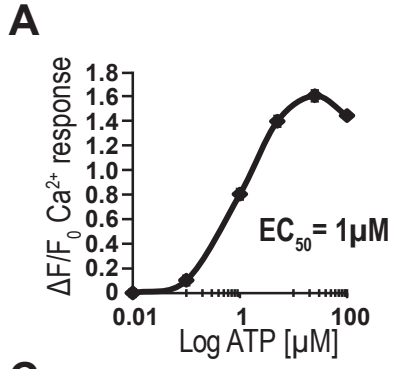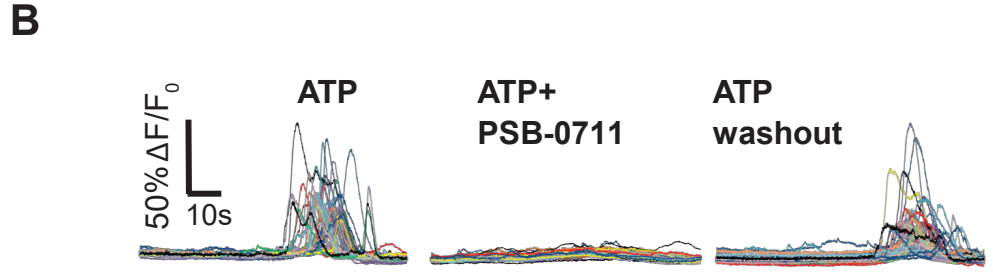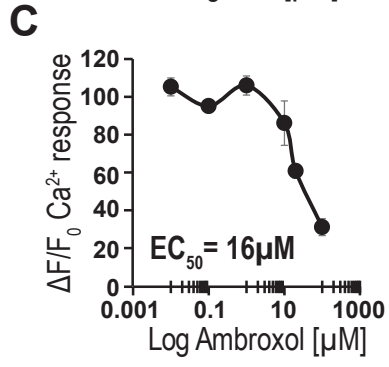

### **Appendix Fig S5: ExATP induces gliosis in human enteric glia**

**A:** Representative concentration-response curve of ATP to induce an increase in intracellular free  $\text{Ca}^{2+}$  levels in human HEK-P2X2 cells. The  $\text{EC}_{50}=1\mu\text{M}$  (cells tested at increasing concentrations of ATP ranging from  $0.1\mu\text{M}$  to  $100\mu\text{M}$  applied at 15 min intervals, see results);  $n=88$ . **B:** Representative experiment showing reversible effect of PSB-0711 on ATP-induced  $\text{Ca}^{2+}$  responses in sniffer cells. **C:** Ambroxol caused a concentration-dependent inhibition of the ATP triggered calcium response. The ambroxol  $\text{EC}_{50}$  is  $16\mu\text{M}$ ;  $n=495$  cells.

**Appendix Table S1:** Human subjects and GI surgical specimens for IHC and hEGC cultures

| #  | Patient ID | Sex    | Age | Surgical procedure                         | GI region               |
|----|------------|--------|-----|--------------------------------------------|-------------------------|
| 1  | PSG283     | female | 35  | Colectomy partial open                     | <i>descending colon</i> |
| 2  | PSG285     | female | 65  | Colectomy total with ileostomy             | <i>descending colon</i> |
| 3  | PSG286     | female | 36  | Sigmoidectomy                              | <i>descending colon</i> |
| 4  | PSG288     | male   | 68  | Colectomy with partial colectomy           | <i>descending colon</i> |
| 5  | PSG291     | female | 56  | Colectomy partial w/colectomy laparoscopic | <i>descending colon</i> |
| 6  | PSG294     | female | 66  | Colectomy partial w/colectomy              | <i>descending colon</i> |
| 7  | hPOI-001   | male   | 55  | Colectomy partial w/colectomy laparoscopic | <i>descending colon</i> |
| 8  | PSG287     | female | 52  | Colectomy partial open                     | <i>ascending colon</i>  |
| 9  | PSG072     | male   | 64  | Colectomy partial w/colostomy              | <i>ascending colon</i>  |
| 10 | PSG077     | female | 57  | Colectomy partial laparoscopic             | <i>descending colon</i> |
| 11 | PSG154     | male   | 64  | Colectomy partial w/ colostomy             | <i>descending colon</i> |
| 12 | PSG270     | male   | 64  | Colectomy partial w/colectomy open         | <i>descending colon</i> |
| 13 | hPOI-010   | male   | 52  | Colectomy partial w/colectomy lap.         | <i>descending colon</i> |
| 14 | PSG289     | female | 50  | Roux-en-Y open                             | <i>jejunum</i>          |

Appendix Table S1 summarizes information on the 14 human subjects that gave written consent, to procure gut surgical tissue for *in vitro* studies. Tissue was used to isolate ganglia, for preparing hEGC cultures for study, or paraffin sections for immunofluorescent staining (including hEGC/IF, colon P2X2-ir and qPCR analysis). Studies were conducted under IRB protocols.



**Appendix Table S2:** Human subjects and GI surgical specimens for analysis of gliosis

| #  | Patient ID | Sex    | Age | Start Time of procedure | Time points of sample collection |
|----|------------|--------|-----|-------------------------|----------------------------------|
| 1  | 160303_hME | male   | 55  | 09:18                   | 11:35 and 14:00                  |
| 2  | 160331_hME | male   | 85  | 08:50                   | 10:50 and 12:16                  |
| 3  | 160405_hME | male   | 79  | 09:14                   | 11:15 and 12:40                  |
| 4  | 180220_hME | male   | 80  | 8:30                    | 12:20 and 13:10                  |
| 5  | 180221_hME | male   | 74  | 10:00                   | 13:45 and 14:15                  |
| 6  | 180424_hME | female | 61  | 08:30                   | 11:35 and 13:50                  |
| 7  | 180821_hME | male   | 59  | 9:00                    | 12:15 and 13:35                  |
| 8  | 181029_hME | female | 73  | 07:45                   | 10:30 and 11:15                  |
| 9  | 190429_hME | female | 61  | 9:15                    | 13:58 and 15:13                  |
| 10 | 190506_hME | male   | 76  | 8:55                    | 12:12 and 13:00                  |
| 11 | 190805_hME | male   | 29  | 10:24                   | 12:00 and 14:29                  |
| 12 | 190806_hME | female | 30  | 10:01                   | 12:25 and 13:30                  |
| 13 | 190808_hME | female | 70  | 10:00                   | 13:40 and 18:20                  |
| 14 | 190917_hME | female | 51  | 9:21                    | 12:07 and 12:55                  |
| 15 | 191017_hME | male   | 75  | 9:11                    | 13:38 and 15:22                  |
| 16 | 191023_hME | male   | 57  | 9:11                    | 11:20 and 14:10                  |

---

Appendix Table S2: Information on 16 patients who underwent pylorus-preserving pancreaticoduodenectomy and gave written consent to procure jejunal tissue for qPCR studies. The tissue was used for RNA isolation, cDNA preparation and gene expression analysis. The study was conducted under protocols permitted by the ethical committee of North Rhine-Westphalia, Germany.

### AppendixTable S3: Oligonucleotide primers

| Gene    | Forward                     | Reverse                    |
|---------|-----------------------------|----------------------------|
| mP2X1   | GGATGGTGCTGGTACGAAACA       | CACTGACACACTGCTGATAAAG     |
| mP2X2   | TTTACTTCGTGTGGTACGTCTTC     | ACATGGTGATCCCCCTTGACTT     |
| mP2X3   | AAAGCTGGACCATTGGGATCA       | CGTGTCCCCGCACTTGGTAG       |
| mP2X4   | ACCAGGAAACGGACTCTGTG        | TCACGGTGACGATCATGTTGG      |
| mP2X5   | AGAAGGTGGGGCTGCTCTA         | ACAGCACTCTGCAGGGAAGT       |
| mP2X6   | GTAGTCTACGTGATAGGGTGGG      | CACGAGGAAGTTGGTTACCAG      |
| mP2X7   | GACAAACAAAGTCACCCGGAT       | CGCTCACCAAAGCAAAGCTAAT     |
| mP2Y1   | TGTGAAGGCACGAGATCCTA        | AGGTGGCACACACTGGTCTT       |
| mP2Y2   | AACTTTGTTTTCTCTAGAGCGTG     | CAGGAAGAACAGGTTCCCAG       |
| mP2Y4   | AGCAGAACACCATTGACTGC        | CAAGGAGTCTGCACTGGTCA       |
| mP2Y6   | GCTTGCTAAAGGGGCTTTCT        | TACTGTTGCTGCCATCTTG        |
| mP2Y10  | TGACAAGGAGTAGTGGATGCC       | ATTGCAATTGCTCTCAGCAC       |
| mP2Y12  | GGACACTTTCCCGTATCCAG        | CAGGTCGGGTAGCACGTTAT       |
| mP2Y13  | GTGGGTTGAGCTAGTAACTGCC      | CAGCTGTGTCATCCGAGTGT       |
| mP2Y14  | AGCCAGACGTGAAGGAGTTC        | AAGGCAAGCTTCGTC AACAG      |
| mA1     | GATCGGTACCTCCGAGTCAAGA      | GGCCTACCACAAGGGAGAGAA      |
| mA2a    | TCCTCACGCAGAGTTCATCT        | GAATGACAGCACCCAGCAAA       |
| mA2b    | TCTTCCTCGCCTGCTTCGT         | CTCGCTCGTGTCCAGTGA         |
| mA3a    | CTTCTATGCCTGCCTTTTCATGT     | ATTCTTCTTTGAGTGGTAACC      |
| mGFAP   | ACATCGAGATCGCCACCTAC        | CCTTCTGACACGGATTTGGT       |
| mNESTIN | AGATCGCTCAGATCCTGGAA        | AGGTGTCTGCAAGCGAGAGT       |
| mRCAN   | CTTGTGTGGCAAACGATGATG       | TGGTGTCTTGT CATATGTTCTG    |
| mFOSb   | ATGGGCTCTCTGTCAACAC         | ACGGAGGAGACCAGAGTGG        |
| mCCL2   | Taqman Assay: Mm00441242    |                            |
| mIL-6   | Taqman Assay: Mm00446190    |                            |
| mCXCL2  | TCCAGGTCAGTTAGCCTTGC        | CGGTCAAAAAGTTTGCCTTG       |
| mCD73   | GCCAAGATAGAGGTGAAACCA       | AGCTGCCCTTATGGAAGAT        |
| mENTPD1 | GCCAAGATAGAGGTGAAACCA       | AGCTGCCCTTATGGAAGAT        |
| mENTPD2 | Taqman Assay: Mm00515450_m1 |                            |
| mENTPD3 | CGGCCACTGATACACGTAGA        | TTCACTCATCCAGATCCGC        |
| mENTPD8 | AGGACACAGGAGTGGTCAGC        | CAGCTCTTCAGGCTTTCCC        |
| 18S-RNA | GTGGAGCGATTTGTCTGGTT        | ACGCTGAGCCAGTCAGTGTA       |
| hGFAP   | CTGCGGCTCGATCAACTCA         | TCCAGCGACTCAATCTTCCTC      |
| hNESTIN | GGGAGTTCTCAGCCTCCAG         | GGAGAAACAGGGCCTACAGA       |
| hRCAN   | GCTCCGCCAAATCCAGACAA        | GCTGCGTGCAATTCATACTTTTC    |
| hFOSb   | CAA GCG GAG ACA GAC CAA CT  | AGT CAG ATC AAG GGA AGC CA |
| hIL-6   | GTCAGGGGTGGTTATTGCAT        | AGTGAGGAACAAGCCAGAGC       |
| hCXCL2  | GGCAGAAAGCTTGTCTCAACCC      | CTCCTTCAGGAACAGCCACCAA     |

Appendix Table S3 summarizes information on all used qPCR primers.

**Appendix Table S4: Oligonucleotide primers**

| Target            | Dye/Dilution         | Secondary antibody*     | Use     | Company                                        |
|-------------------|----------------------|-------------------------|---------|------------------------------------------------|
| MHCII             | PE / 1:200           |                         | FACS    | Biolegend<br>Clone:M5/114.15.2<br>#107607      |
| CD45              | Pacific blue / 1:200 |                         | FACS    | Biolegend Clone:<br>30-F11<br>#103126          |
| Ly6C              | APC / 1:300          |                         | FACS    | eBioscience<br>Clone: HK1.4<br># 17-5932-82    |
| GFP               | 1:600                | AlexaFluor488           | IHC     | Novus biologicals<br>Clone: 1A8<br>#NB100-1614 |
| MHCII             | 1:400                | AlexaFluor647<br>or Cy3 | IHC     | BioLegend<br>Clone:M5/114.15.2<br># 107602     |
| GFAP              | 1:1000               | AlexaFluor647           | IHC/ICC | Synaptic System<br># 173002                    |
| Sox10             | 1:400                | Cy3                     | IHC/ICC | Santa Cruz<br># sc- 17342                      |
| Ki67              | 1:400                | Cy2                     | IHC     | Abcam<br>Clone: SP6<br># ab16667               |
| P2X2              | 1:400                | Cy2                     | IHC, WB | Alomone<br># APR-003                           |
| $\alpha$ SMA      | 1:1000               | Cy2                     | ICC     | Dianova<br># APR-003                           |
| FOSb              | 1:200                | Cy3                     | IHC     | Santa Cruz<br># sc52                           |
| s100 $\beta$      | 1:1000               | AlexaFluor647           | ICC     | Synaptic System<br># 287004                    |
| Cleaved-Caspase 3 | 1:400                | AlexaFluor647           | ICC     | cell signaling<br># cs9664                     |
| P-p38 MAPK        | 1:400/ 1:1000        | Cy2                     | ICC,WB  | cell signaling<br># cs9212                     |
| p38 MAPK          | 1:1000               |                         | WB      | cell signaling<br># cs4631                     |

|                                     |        |     |         |                                  |
|-------------------------------------|--------|-----|---------|----------------------------------|
| Actin                               | 1:5000 |     | WB      | SIGMA<br>#A5316                  |
| s100β                               | 1:500  | Cy3 | IHC/ICC | Abcam<br># ab11178               |
| αSMA                                | 1:500  | Cy2 | ICC     | Abcam<br># ab18147               |
| antifibroblast /<br>epithelial cell | 1:500  | Cy2 |         | Novus biologicals<br># NB600-777 |

Appendix Table S4 summarizes information on all used antibodies.
