# Supplementary material for: A novel P2X2‐dependent purinergic mechanism of enteric gliosis in intestinal inflammation
Source: EMBO Mol Med. 2020 Dec 17;13(1):e12724. doi: 10.15252/emmm.202012724 (PMC7799361; doi:10.15252/emmm.202012724)
Supplement: Supplementary file 2 — Expanded View Figures PDF [file EMMM-13-e12724-s002.pdf]

## Expanded View Figures

### Figure EV1. ExATP induces gliosis in enteric glia cells.

- A Histological analysis of EGC culture purity by quantification of EGCs and fibroblasts *in vitro*. Representative immunofluorescence image shows GFAP (violet)-positive EGCs and  $\alpha$  smooth muscle actin ( $\alpha$ SMA, green)-positive fibroblasts with DAPI as counterstain. Scale bar 50  $\mu$ m.
- B Representative immunofluorescence image of s100 $\beta$  (violet)- and Sox10 (green)-positive EGCs with DAPI as counterstain. Scale bar 10  $\mu$ m.
- C PCA plot of gene expression by ATP-treated and untreated EGCs. Blue circles represent ATP-treated EGC cultures, and white circles are matching controls;  $n = 5-6$ , respectively.
- D Heat map of ATP-target genes, showing a collection of known target genes of ATP signaling ( $n = 5-6$ , msEGCs).
- E Representative Western blots of phospho-p38-MAPK (pp38) and p38-MAPK (p38) in 1 h ATP-treated EGCs. Actin was used as loading control ( $n = 3$ , msEGCs).
- F Representative images of GFAP (violet)- and phospho-p38-MAPK (pp38, green)-positive msEGCs with or without ATP treatment (100  $\mu$ M) for 1 h. White arrows show pp38-positive (ATP-treated) or negative (untreated) EGCs. Scale bar is 10  $\mu$ m.
- G Effect of p38 inhibition on ATP-induced IL-6 release. Cells were treated with the p38-MAPK inhibitor SB203580 (1, 5, 10  $\mu$ M) alone or together with ATP (100  $\mu$ M) for 24 h. ELISA measurement of IL-6 in msEGCs supernatants ( $n = 7-22$ , msEGCs).
- H Effect of p38 inhibition on ATP induced mRNA expression of gliosis markers in msEGCs. Cells were treated with SB203580 (10  $\mu$ M) alone or together with ATP (100  $\mu$ M) for 6 h ( $n = 4$ , msEGCs).

Data information: In (A), data are represented as percentage + SEM normalized to the total cell numbers,  $n = 8$ , msEGCs. In (G and H), data are represented as fold induction + SEM. Statistics were done in (G and H) by applying unpaired Student's *t*-test and one-way ANOVA with a subsequent Bonferroni test. \* indicates significance to control, and # indicates significance to the ATP treatment with \*/# $P < 0.05$ , ## $P < 0.01$ , and \*\*\*/### $P < 0.001$ .

Source data are available online for this figure.

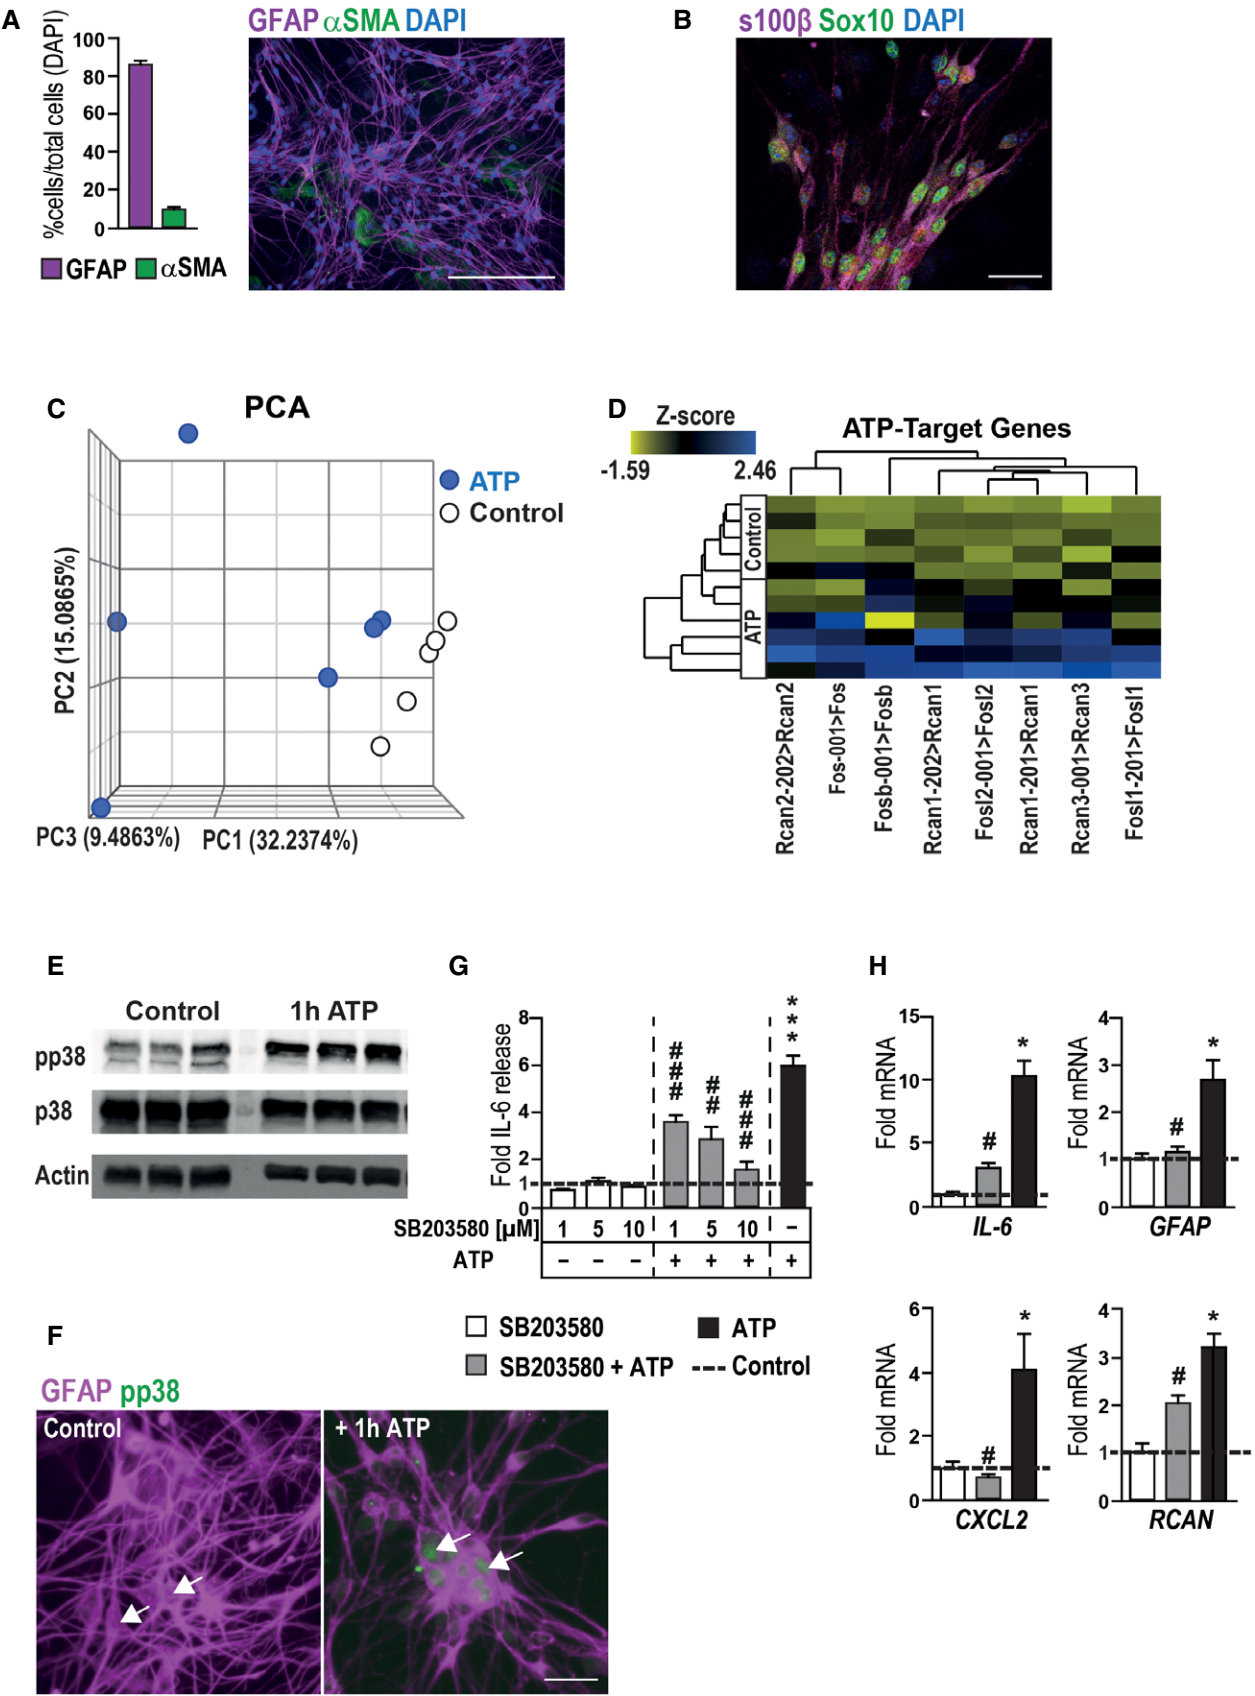

Figure EV1.

**Figure EV2. ATP-induced gliosis is mediated by p38-MAPK and P2X2-purinergic signaling.**

- A IL-6 release measurement by ELISA of IL-6 in msEGCs. Cells were treated adenosine (1 and 100  $\mu$ M) or with ATP (100  $\mu$ M) for 24 h;  $n = 14$ –16, msEGCs.
- B Protein release measurement by ELISA of IL-6 in msEGCs. Cells were treated with P2 antagonist PPADS (5, 30  $\mu$ M) alone or together with ATP (10 or 100  $\mu$ M) for 24 h;  $n = 11$ –12, msEGCs.
- C Protein release measurement by ELISA of IL-6 in msEGCs. Cells were treated with P2X2 antagonist PSB-1011 (0.2, 2, 20  $\mu$ M) or PSB-0711 (0.2, 2, 20  $\mu$ M) alone or together with ATP (10  $\mu$ M) for 24 h;  $n = 9$ –13, msEGCs.
- D Schematic overview of the isolation of msEGCs from small bowel muscularis externa of GFAP<sup>cre</sup>-Ai14<sup>fl/wt</sup> mice: FACS-sorted tdTomato<sup>+</sup> msEGCs were either analyzed directly (ME-tissue) or in cultured msEGCs before tdTomato-FACS-sorting and further analysis;  $n = 3$ –6.
- E Gene expression analysis by qPCR of *GFAP* and *Sox10* in msEGC cultures ( $n = 10$ ) and mouse ME tissue ( $n = 10$ ).
- F, G Representative images of co-localization of GFAP (green) and tdTomato<sup>+</sup> msEGC (red) in the ME and in cultured EGCs. Scale bars 50  $\mu$ m.
- H–K qPCR analysis of P2-purinergic receptors in msEGCs isolated from ME (H, J;  $n = 3$ ) or from cultured cells (I, K;  $n = 6$ ), respectively.
- L, M Representative Western blots of P2X2 in msEGCs transfected with siRNA-control or siRNA-P2X2 for 72 h together with an optical density measurement, see in M. Actin was used as loading control and normalization ( $n = 6$ , msEGCs).

Data information: In (A–C and E), data are represented as fold induction + SEM. In (H–K), data are represented as mean + SEM normalized to *GAPDH* expression. In (M), data are represented as optical density + SEM normalized to actin expression. Statistics were done by applying unpaired Student's *t*-test in (A–C, M and E) or both by unpaired Student's *t*-test and one-way ANOVA with a subsequent Bonferroni test in (B and C). \* indicates significance to control, and # indicates significance to the ATP treatment with # $P < 0.05$ , \*\*/# $P < 0.01$ , and \*\*\*/### $P < 0.001$ .

Source data are available online for this figure.

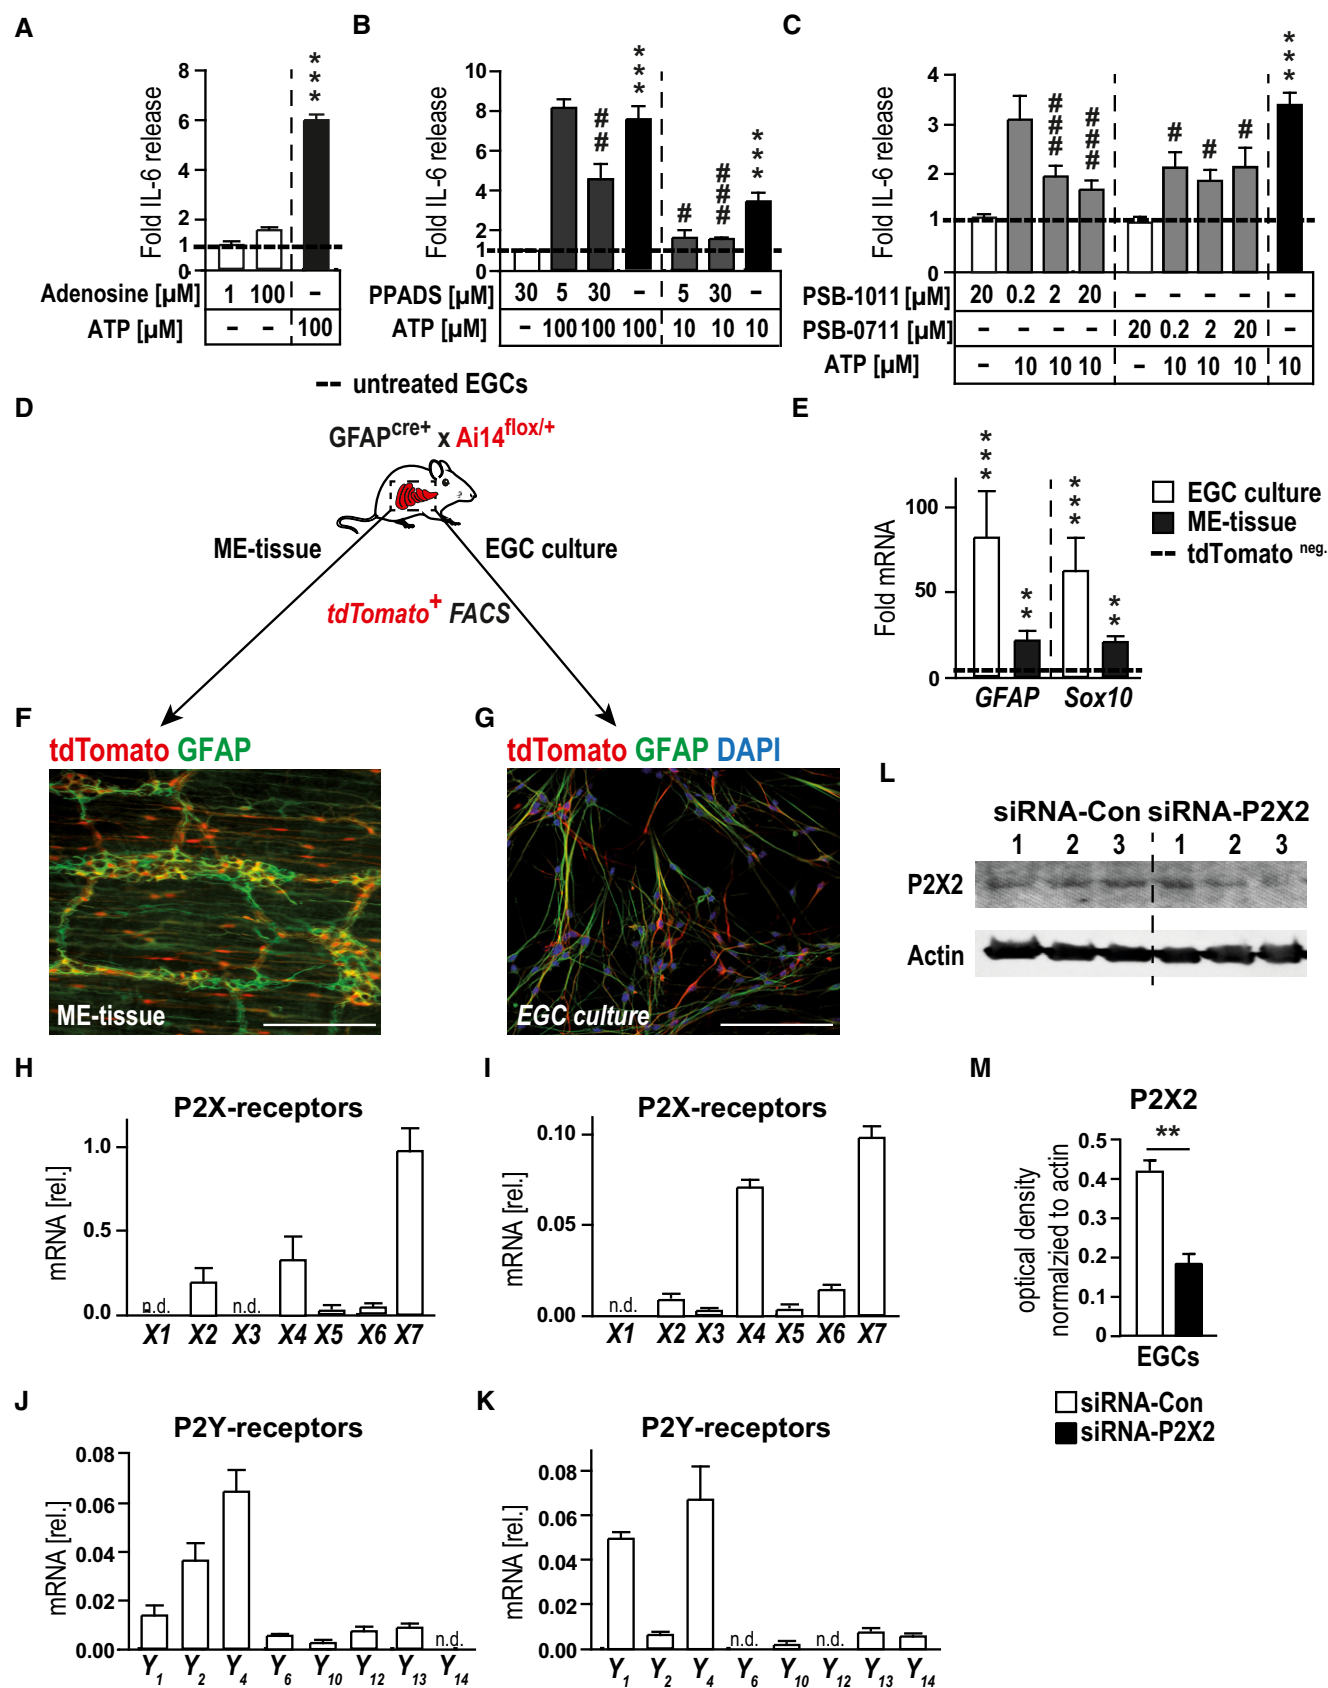

Figure EV2.

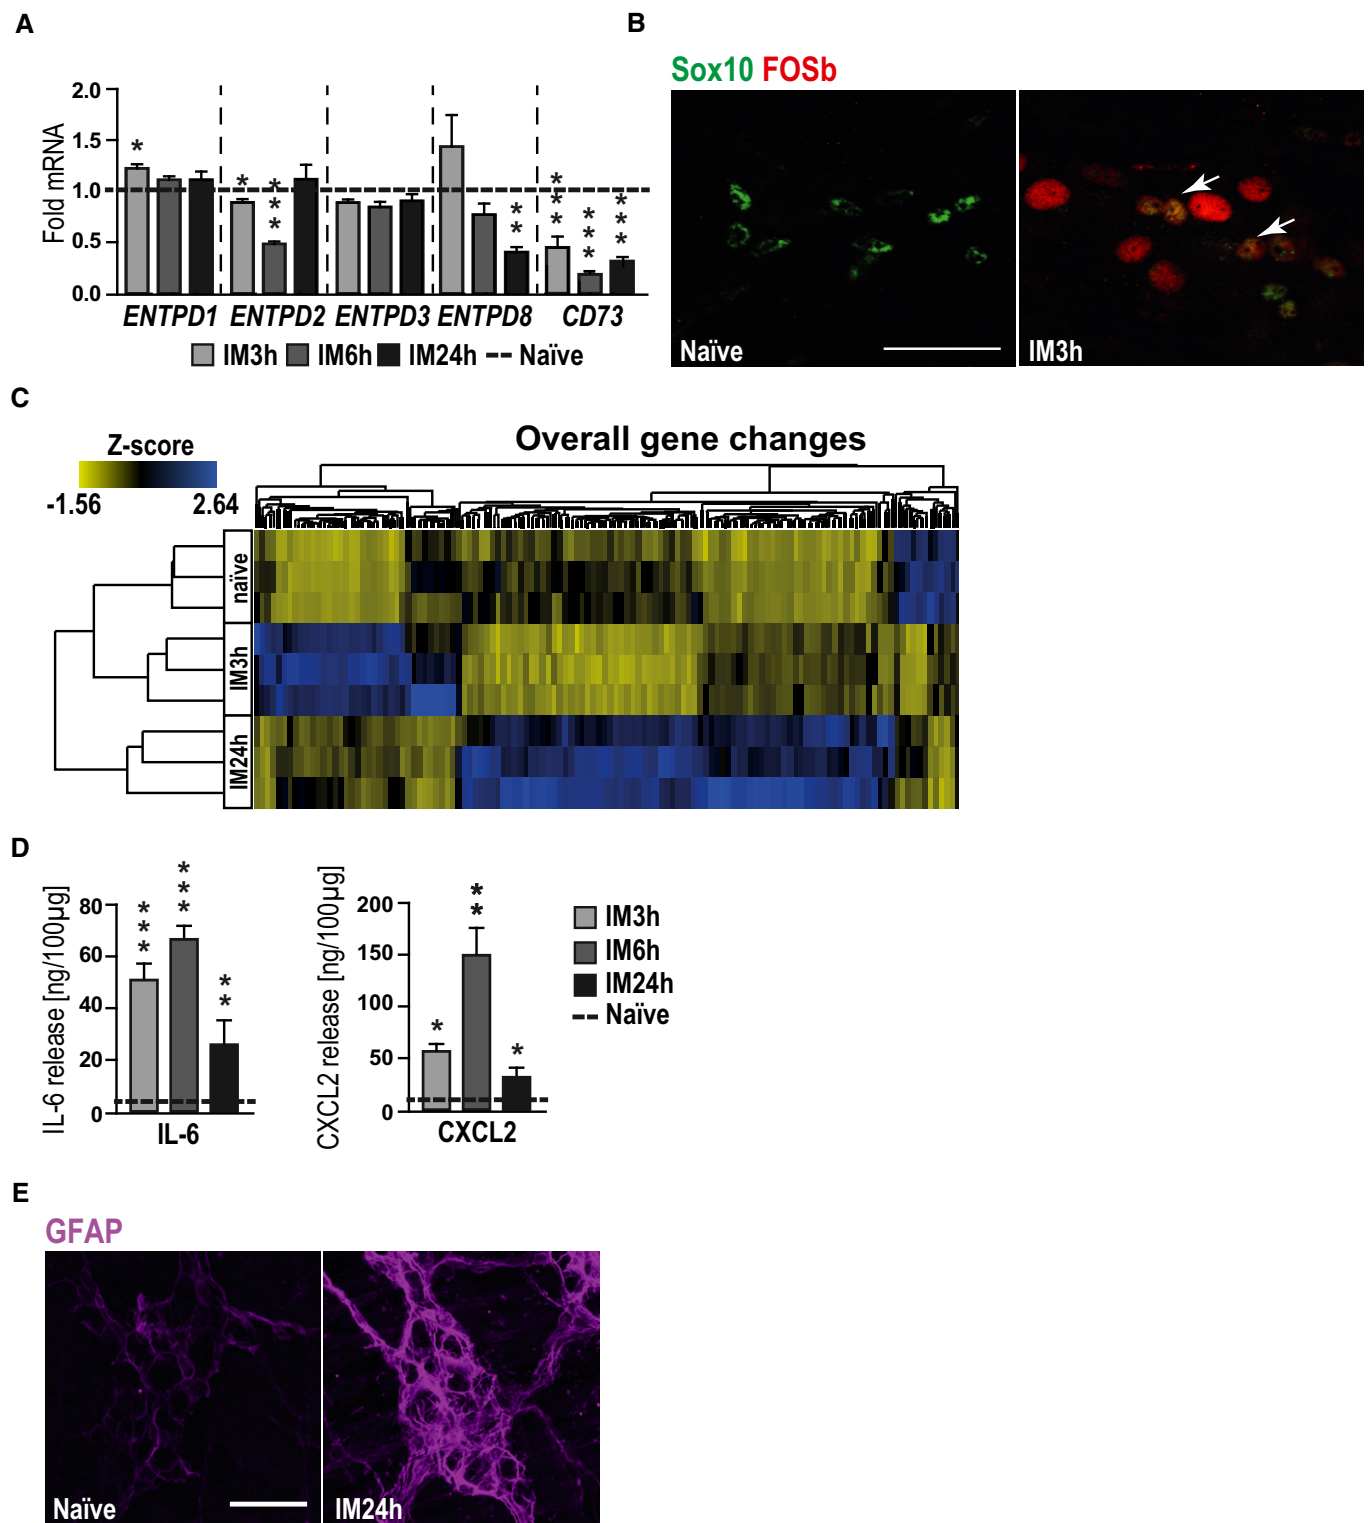

Figure EV3.

**Figure EV3. Intestinal inflammation induces enteric gliosis.**

- A Gene expression of ectonucleotidases in POI mice at indicated disease stages.
- B Representative confocal images of the activation marker FOSb (red)- and Sox10 (green)-positive EGCs (white arrows) in ganglia of intestinally manipulated mice (3 h after IM) or naïve mice. Scale bar 50  $\mu$ m.
- C Heat map of all significantly changed genes from POI mice at different disease stages and naïve mice;  $n = 3$  for each group.
- D Protein release analysis by ELISA of IL-6 or CXCL2 in POI mice at indicated disease stages.
- E Representative confocal images of gliosis marker GFAP (violet)-positive EGCs in ganglia of intestinally manipulated mice (24 h after IM) or naïve mice. Scale bar 50  $\mu$ m.

Data information: In (A), data are represented as fold change + SEM;  $n = 7$ , POI mice. In (D), data are represented as IL-6/CXCL2 protein in 100  $\mu$ g tissue + SEM;  $n = 7$ , POI mice. Statistics were done in (A, D) by applying unpaired Student's  $t$ -test. \* indicates significance to control with  $*P < 0.05$ ,  $**P < 0.01$ , and  $***P < 0.001$ .

Source data are available online for this figure.

**Figure EV4. P2X2 signaling inhibition by ambroxol improves clinical symptoms in POI.**

- A Concentration-dependent inhibition of ATP-induced calcium influx in 1321N1-astrocytoma cells with recombinant expression of the human P2X2 receptor. ATP was used in a concentration corresponding to its EC80 value (1  $\mu$ M). An  $IC_{50}$  value for ambroxol of  $5.69 \pm 1.06 \mu$ M  $\pm$  SEM was determined. Inhibitory potency of ambroxol at P2X receptor subtypes X1-X7. At an initial test concentration of 20  $\mu$ M, only the P2X2 receptor subtype was blocked by more than 50% indicating P2X2 receptor selectivity and no significant receptor inhibition was detected (n.d.) with other P2 receptor subtypes ( $n = 6$ ).
- B Protein release analysis by ELISA of IL-6 and CXCL2 in POI mice treated with ambroxol or vehicle at 24 h.
- C Gene expression analysis by qPCR of *CCL2* and *TNF $\alpha$*  in POI mice treated with ambroxol or vehicle at IM3h and 24h;  $n = 6$  POI mice.
- D Representative FACS gating strategy of infiltrating cells in the ME of mice treated with ambroxol or vehicle. CD45, Ly6C, and CX3CR1 were used to distinguish resident macrophages (CD45<sup>+</sup>/Ly6C<sup>-</sup>/CX3CR1<sup>+</sup>), infiltrating monocytes (CD45<sup>+</sup>/Ly6C<sup>+</sup>/CX3CR1<sup>-</sup>), and infiltrated monocyte-derived macrophages (CD45<sup>+</sup>/Ly6C<sup>+</sup>/CX3CR1<sup>+</sup>);  $n = 3$ –5 POI mice per group.
- E Representative confocal images of GFAP (violet)-positive EGCs and CX3CR1-GFP-positive macrophages (green, white arrows) around ganglia of intestinally manipulated mice treated with ambroxol or vehicle (24 h after IM). Scale bar 50  $\mu$ m.

Data information: In (B), data are represented as IL-6 or CXCL2 protein in 100  $\mu$ g tissue + SEM;  $n = 6$  POI mice. In (C), data are represented as fold change + SEM.

Statistics were done in (B and C) by applying unpaired Student's  $t$ -test and one-way ANOVA with a subsequent Bonferroni test. \* indicates significance to sham animals, and # indicates significance between vehicle and ambroxol treatment with  $^{\#}P < 0.05$ ,  $^{\# \#}P < 0.01$ , and  $^{\# \# \#}P < 0.001$ .

Source data are available online for this figure.

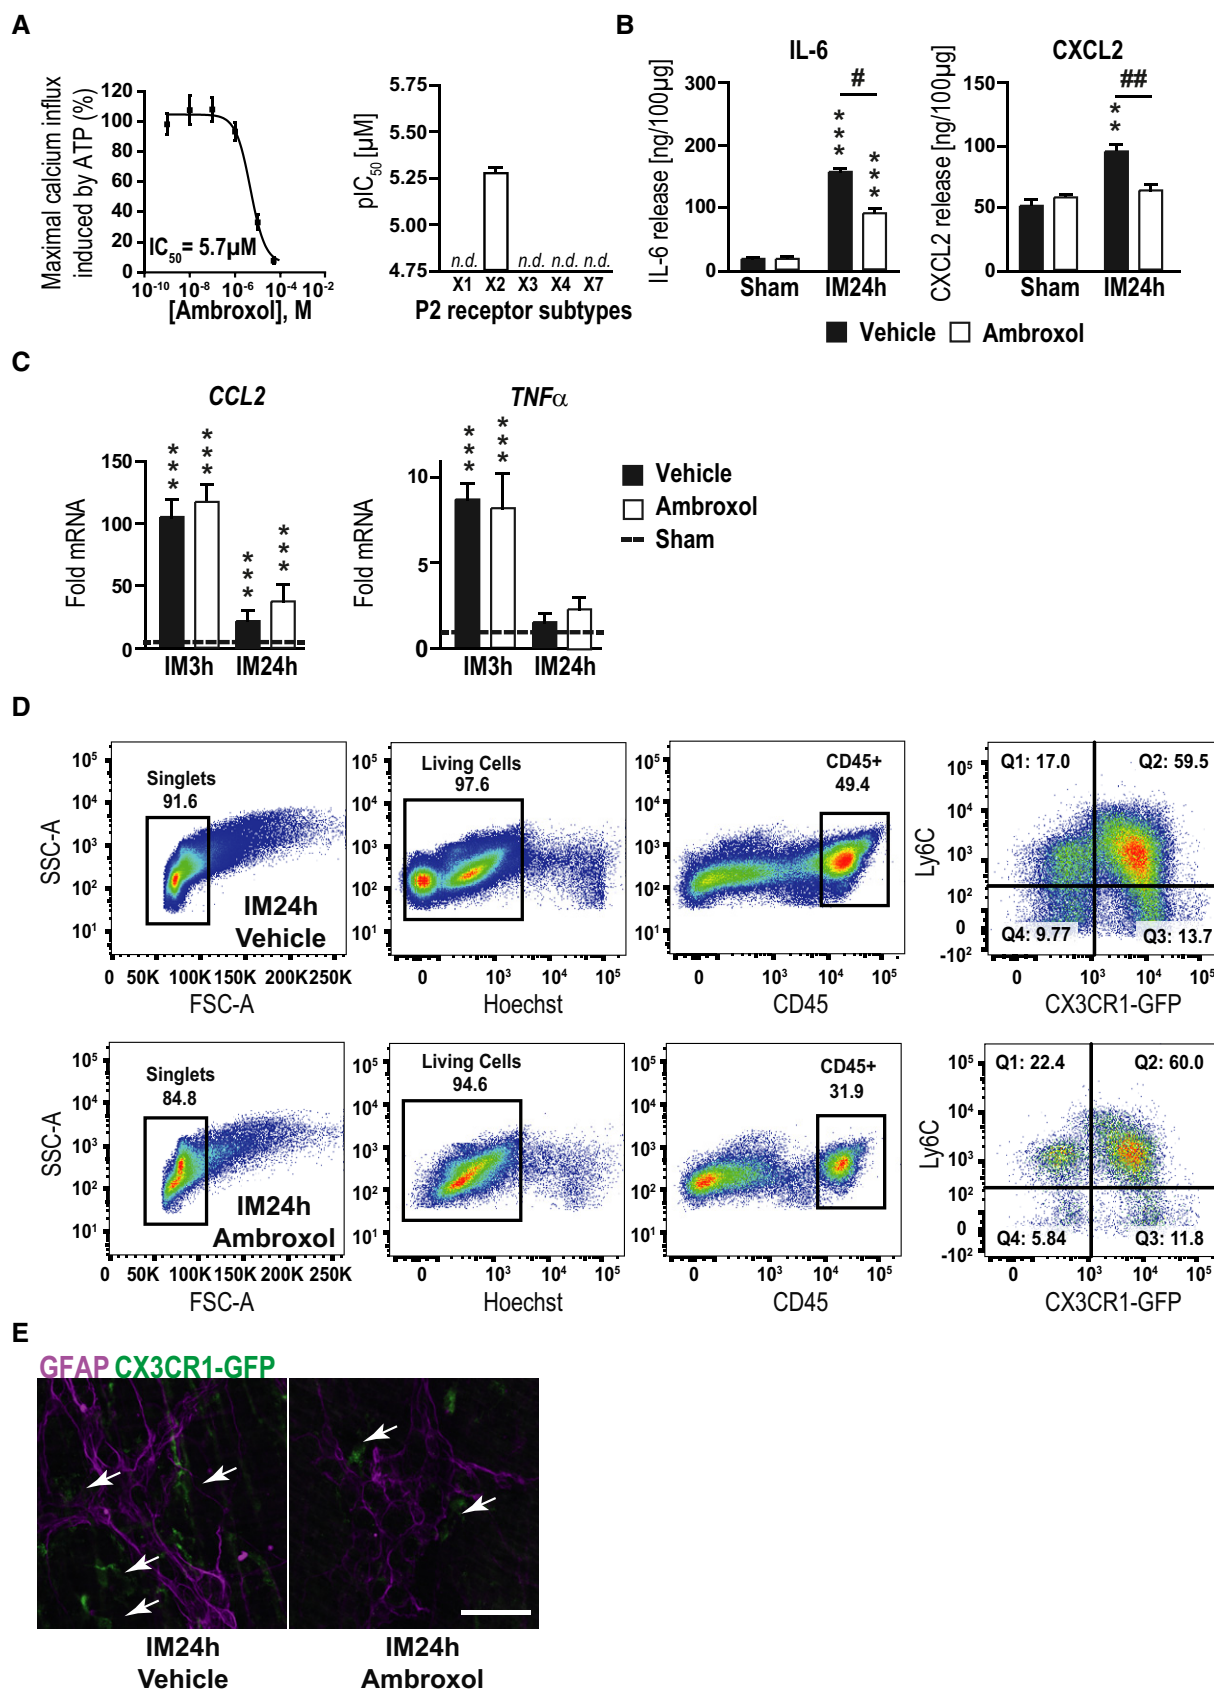

Figure EV4.

**Figure EV5. ExATP induces gliosis in human enteric glia.**

- A PCA plot of gene expression from patient specimens at two different time points of the surgery;  $n = 3$  for early and late specimens.
- B IL-6 protein measurement in human surgical specimens collected during a pancreaticoduodenectomy at an early and a late time point of surgery. Samples were provided on ice directly from the operation room, and *muscularis externa* (ME) was separated from the lamina propria mucosae;  $n = 9$  human patients.
- C Gene expression analyses of gliosis marker in human surgical specimens collected during a pancreaticoduodenectomy at an early and a late time point of surgery. The late specimens' mRNA level show an up-regulation of gliosis genes.
- D Immunofluorescence microscopy revealed P2X2 expression (green) in a majority of s100 $\beta$ <sup>+</sup> (violet) hEGCs in intact myenteric ganglia of the human colon. White arrows mark double-positive cells. Scale bar 50  $\mu$ m.
- E Immunofluorescence microscopy revealed P2X2 expression (green) in a majority of s100 $\beta$ <sup>+</sup> (violet) hEGCs in culture. DAPI counterstained nuclei. Quantification of double-positive cells showed that 75% of cultured hEGCs express P2X2 (marked with +). Scale bar 50  $\mu$ m.
- F Schematic workflow on the collection and processing of surgical specimens collected during a pancreaticoduodenectomy. Samples were provided directly from the operation room in oxygenated Krebs–Henseleit buffer and were mechanically activated *ex vivo*. Immediately after activation, specimens were incubated for 3 h with or without ambroxol (20  $\mu$ M). Finally, ME was isolated and further processed for qPCR analysis.

Data information: In (B), data are represented as IL-6 protein in 100  $\mu$ g tissue;  $n = 9$  human patients. In (C), data are represented as fold change;  $n = 13$  human patients. In (E), data are represented as the percentage of P2X2<sup>+</sup>/s100 $\beta$ <sup>+</sup> cells + SEM;  $n = 16$ , hEGCs. Statistics were done by applying unpaired Student's *t*-test in (B, C). \* indicates significance to control with  $*P < 0.05$ ,  $**P < 0.01$ , and  $***P < 0.001$ .

Source data are available online for this figure.

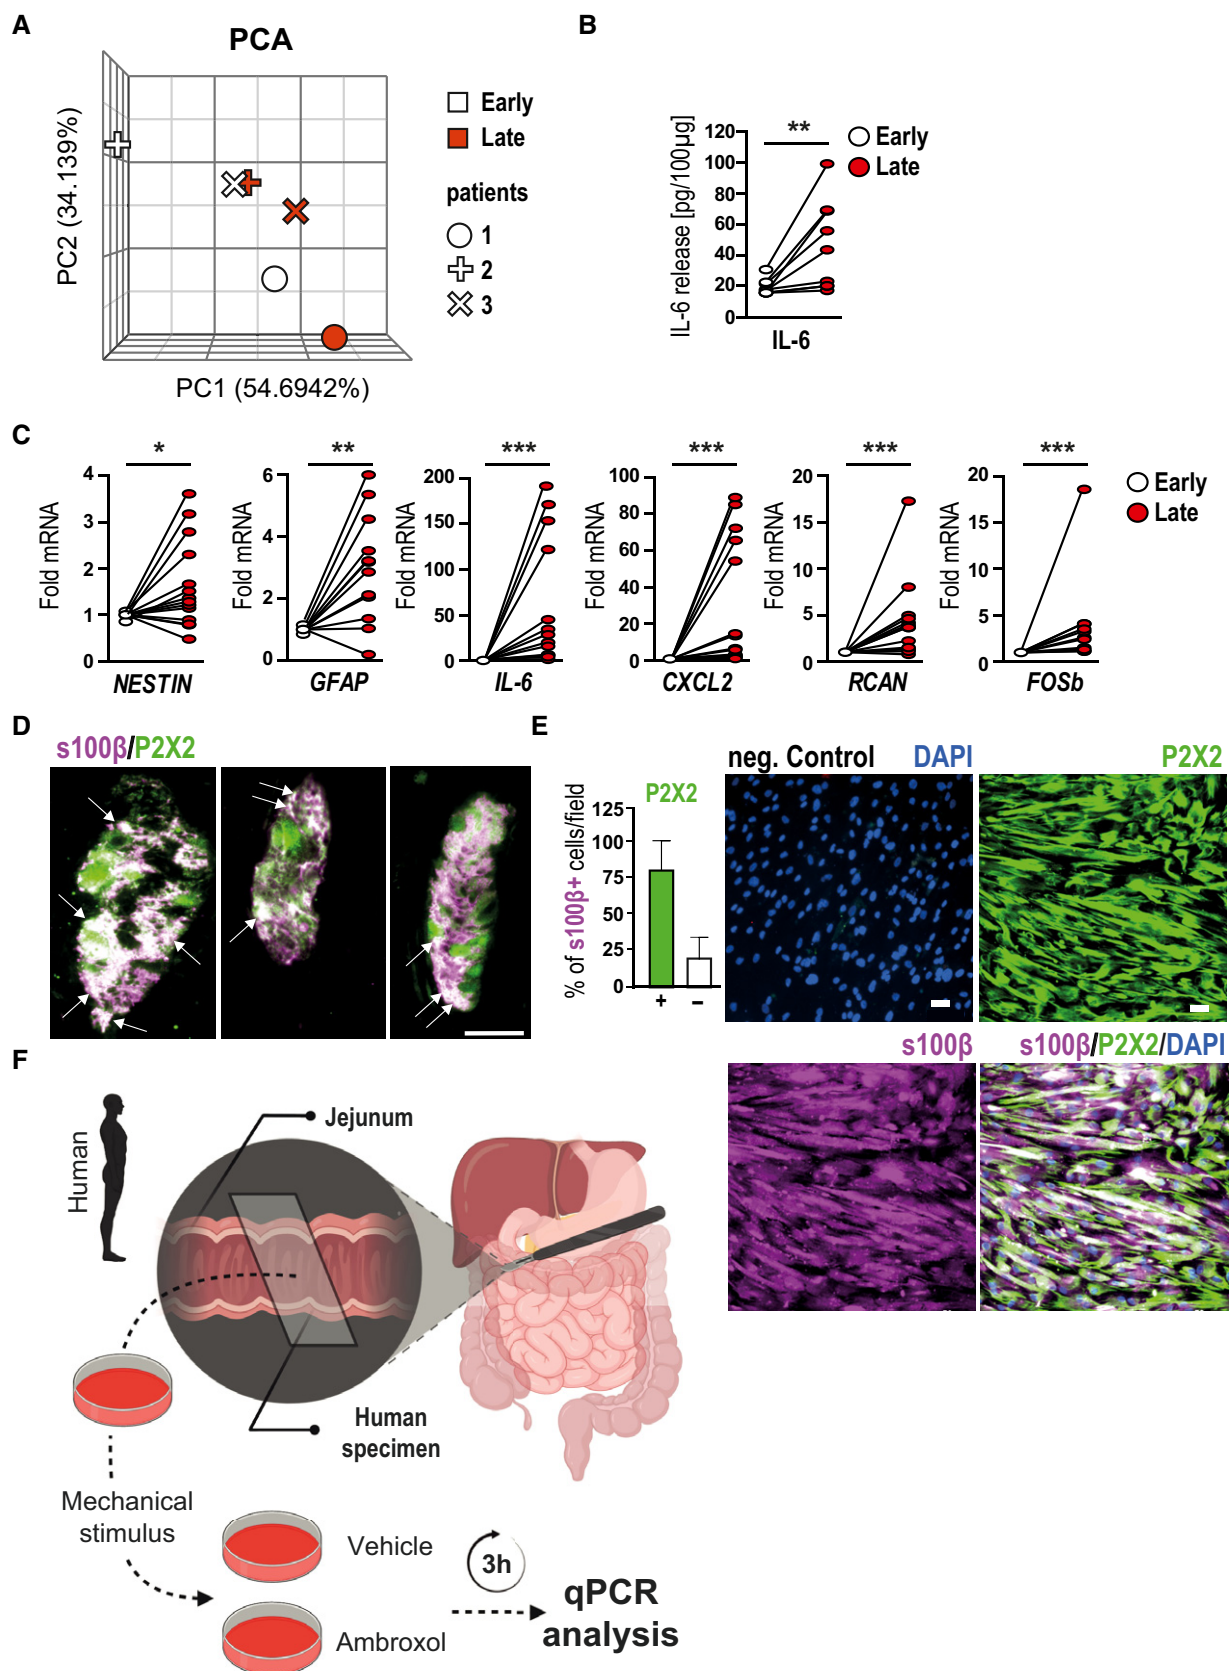

Figure EV5.
